# Supplementary material for: A highly efficient g-C3N4/SiO2 heterojunction: the role of SiO2 in the enhancement of visible light photocatalytic activity
Source: Royal Society of Chemistry journal article supplement (doi:10.1039/c6cp06122b), 2016-01-01
Supplement: c6cp06122b1.pdf [file c6cp06122b1.pdf]

Supporting Information

## **Highly Efficient g-C<sub>3</sub>N<sub>4</sub>/SiO<sub>2</sub> Heterojunction: The role of SiO<sub>2</sub> for the Enhanced Visible Light Photocatalytic Activity**

Qiang Hao,<sup>a</sup> Xiuxiu Niu,<sup>a</sup> Changshun Nie,<sup>a</sup> Simeng Hao,<sup>a</sup> Wei Zou,<sup>a</sup> Jiangman Ge<sup>a</sup>

Daimei Chen,<sup>\*a</sup> and Wenqing Yao<sup>\*b</sup>

*a (National Laboratory of Mineral Materials, School of Material Science and Technology, China University of Geosciences, Beijing 100083, China)*

*b (Department of Chemistry, Tsinghua University, Beijing, 100084, PR China. E-mail: yaowq@tsinghua.edu.cn)*

\*Corresponding author.

Tel.: +86 15801558907; fax: +86 10 82322974.

E-mail: chendaimei@cugb.edu.cn;

1. Figure S1: Fourier Transform Infrared Spectrometer (FTIR) of prepared samples.

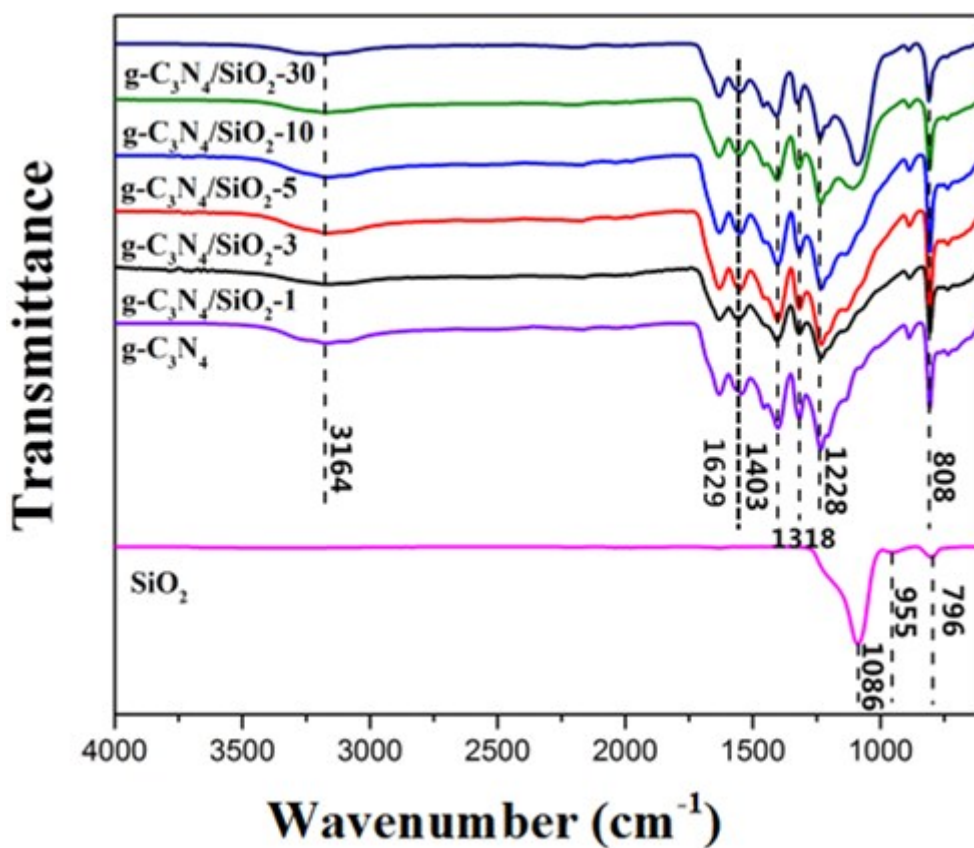

Figure S1. FT-IR spectra of g-C<sub>3</sub>N<sub>4</sub>, SiO<sub>2</sub> and g-C<sub>3</sub>N<sub>4</sub>/SiO<sub>2</sub> samples.

Figure S1 shows the FT-IR spectra of g-C<sub>3</sub>N<sub>4</sub>, SiO<sub>2</sub> and g-C<sub>3</sub>N<sub>4</sub>/SiO<sub>2</sub> samples. In the FT-IR spectrum of g-C<sub>3</sub>N<sub>4</sub>, the peak at 1629 cm<sup>-1</sup> is attributable to the C=N stretching vibration modes, while the peaks at 1228 cm<sup>-1</sup>, 1318 cm<sup>-1</sup> and 1403 cm<sup>-1</sup> are due to the aromatic C-N stretching.<sup>1-3</sup> The peak at 808 cm<sup>-1</sup> is related to the s-triazine ring modes.<sup>4</sup> The peak at 1086 cm<sup>-1</sup> is a Si-O-Si antisymmetric stretching and the peak at 796 cm<sup>-1</sup> is Si-O symmetric stretching. The peak at 955 cm<sup>-1</sup> is caused by the bending vibration of Si-OH. With the increase of SiO<sub>2</sub>, a small peak at 1086 cm<sup>-1</sup> can be

observed in the g-C<sub>3</sub>N<sub>4</sub>/SiO<sub>2</sub> composites, but the wavenumber has not changed which means the force between g-C<sub>3</sub>N<sub>4</sub> and SiO<sub>2</sub> is a physical process, rather than chemical action.

## 2. Fluorescence spectrum (PL) of SiO<sub>2</sub>

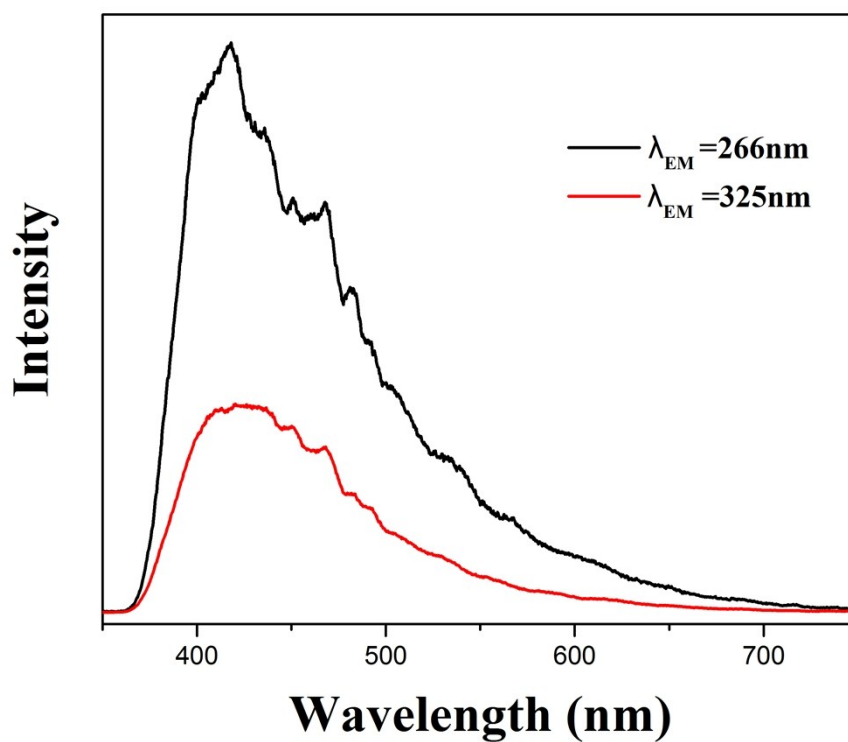

**Figure S2. Fluorescence spectrum (PL) of SiO<sub>2</sub> under excitation by the 266 nm and 325 nm lasers**

Under excitation by the 266 nm and 325 nm lasers, SiO<sub>2</sub> has a lot of peaks, indicating its impurity energy level. The valence band maximum is mainly composed

of the by O 2p orbital<sup>5</sup> and the energy levels of the surface states for quartz are at least 2.19 eV to 3.08 eV above the valence band.

### **Reference:**

- [1] Zhao, Y. C.; Yu, D. L.; Zhou, H. W.; Tian, Y. J.; Yanagisawa, O. Turbostratic carbon nitride prepared by pyrolysis of melamine. *J Mater Sci.* **2005**, *40*, 2645-2647..
- [2] Li, X.; Zhang, J.; Shen, L.; Ma, Y.; Lei, W.; Cui, Q.; Zou, G. Preparation and characterization of graphitic carbon nitride through pyrolysis of melamine. *Appl Phys A.* **2009**, *94*, 387-392.
- [3] Liu, L.; Ma, D.; Zheng, H.; Li, X.; Cheng, M.; Bao, X. Synthesis and characterization of microporous carbon nitride. *Micropor Mesopor Mater.* **2008**, *110*, 216-222.
- [4] Liu, L.; Ma, D.; Zheng, H.; Li, X.; Cheng, M.; Bao, X. Synthesis and characterization of microporous carbon nitride. *Environ Sci Technol.* **2008**, *42*, 2342-2348.
- [5] Li, R.; Wang, X.; Jin, S.; Zhou, X.; Feng, Z.; Li, Z.; Shi, J.Y.; Zhang, Qiao.; Li, C. Photo-induced H<sub>2</sub> production from a CH<sub>3</sub>OH-H<sub>2</sub>O solution at insulator surface. *Sci Rep-UK.* **2015**, *5*.
